# Supplementary material
Source: HighWire-hosted journal article supplement (https://bmjopengastro.bmj.com/content/10/1/e001045)
Supplement: inline-supplementary-material-1 [file inline-supplementary-material-1.pdf]

## Supplementary Tables

Supplementary Table 1: Distribution of demographic and clinical characteristics of appendiceal and cecal adenocarcinomas

| Variable          | Category                                                   | Appendiceal cancer | Cecal cancer     |
|-------------------|------------------------------------------------------------|--------------------|------------------|
|                   |                                                            | Total Number (%)   | Total Number (%) |
|                   |                                                            | 6491 (6.13)        | 99387 (93.87)    |
| Sex               | Male                                                       | 4756 (45.49)       | 45004 (42.68)    |
|                   | Female                                                     | 5699 (54.51)       | 60437 (57.32)    |
| Age Quartile      | Quartile 1: ≤61                                            | 3655 (56.31)       | 23126 (23.27)    |
|                   | Quartile 2: >61 and ≤72                                    | 1591 (24.51)       | 22642 (22.78)    |
|                   | Quartile 3: >72 and ≤81                                    | 824 (12.69)        | 27032 (27.20)    |
|                   | Quartile 4: >81                                            | 421 (6.49)         | 26587 (26.75)    |
| Year of Diagnosis | 2006-2016                                                  | 7115 (68.05)       | 43950 (41.68)    |
|                   | 1991-2005                                                  | 2681 (25.64)       | 41997 (39.83)    |
|                   | 1975-1990                                                  | 659 (6.30)         | 19494 (18.49)    |
| Race              | White                                                      | 8766 (83.85)       | 87592 (83.07)    |
|                   | Asian/Pacific<br>Islander/American<br>Indian/Alaska Native | 682 (6.52)         | 5263 (4.99)      |
|                   | Black                                                      | 1007 (9.63)        | 12586 (11.94)    |
| Ethnicity         | Non-Hispanic                                               | 9346 (89.39)       | 97680 (92.64)    |
|                   | Hispanic                                                   | 1109 (10.61)       | 7761 (7.36)      |
| Marital Status    | Married                                                    | 6301 (60.27)       | 53203 (50.46)    |
|                   | Divorced                                                   | 879 (8.41)         | 7758 (7.36)      |
|                   | Separated                                                  | 135 (1.29)         | 1377 (1.31)      |
|                   | Never married                                              | 1811 (17.32)       | 12182 (11.55)    |
|                   | Widowed                                                    | 836 (8.00)         | 26702 (25.32)    |
|                   | Unmarried or domestic<br>partner                           | 25 (0.24)          | 47 (0.04)        |
|                   | Unknown                                                    | 468 (4.48)         | 4172 (3.96)      |
| Histology         | Non-mucinous                                               | 2235 (34.43)       | 84812 (85.34)    |
|                   | Mucinous                                                   | 3602 (55.49)       | 13136 (13.22)    |
|                   | Signet-ring cell                                           | 654 (10.08)        | 1439 (1.45)      |
| Stage             | Local                                                      | 3457 (33.07)       | 24300 (23.05)    |
|                   | Regional                                                   | 2376 (22.73)       | 29581 (28.05)    |
|                   | Distant                                                    | 3185 (30.46)       | 17303 (16.41)    |
|                   | Unknown                                                    | 1437 (13.74)       | 34257 (32.49)    |
| Grade             | I: Well differentiated                                     | 2965 (28.36)       | 9230 (8.75)      |
|                   | II: Moderately differentiated                              | 2491 (23.83)       | 57777 (54.80)    |
|                   | III: Poorly differentiated                                 | 1385 (13.25)       | 22069 (20.93)    |
|                   | IV: Undifferentiated;<br>anaplastic                        | 168 (1.61)         | 2419 (2.29)      |
|                   | Unknown                                                    | 3446 (32.96)       | 13946 (13.23)    |

|              |                         |              |               |
|--------------|-------------------------|--------------|---------------|
| Surgery      | Surgery Performed       | 5921 (91.22) | 91239 (91.80) |
|              | No Surgery              | 551 (8.49)   | 7718 (7.77)   |
|              | Unknown                 | 19 (0.29)    | 430 (0.43)    |
| Chemotherapy | Chemotherapy            | 3481 (33.30) | 28908 (27.42) |
|              | No chemotherapy/Unknown | 6974 (66.70) | 76533 (72.58) |

Supplementary Table 2: Demographic, clinical, and county-level socioeconomic factors associated with five-year overall survival in appendiceal and cecal adenocarcinoma using multivariable Cox regression analysis

| Variable          | Category                                             | Hazard Ratio | 95% Confidence Interval | P-value* |
|-------------------|------------------------------------------------------|--------------|-------------------------|----------|
| Sex               | Male                                                 | 1            |                         |          |
|                   | Female                                               | 0.84         | 0.82-0.85               | <0.001   |
| Age Quartile      | Quartile 1: ≤61                                      | 1            |                         |          |
|                   | Quartile 2: >61 and ≤72                              | 1.23         | 1.20-1.26               | <0.001   |
|                   | Quartile 3: >72 and ≤81                              | 1.55         | 1.51-1.59               | <0.001   |
|                   | Quartile 4: >81                                      | 2.32         | 2.25-2.39               | <0.001   |
| Year of Diagnosis | 2005-2016                                            | 1            |                         |          |
|                   | 1991-2005                                            | 1.25         | 1.12-1.29               | <0.001   |
|                   | 1975-1990                                            | 1.45         | 1.39-1.51               | <0.001   |
| Race              | White                                                | 1            |                         |          |
|                   | Asian/Pacific Islander/American Indian/Alaska Native | 0.91         | 0.87-0.95               | <0.001   |
|                   | Black                                                | 1.16         | 1.13-1.19               | <0.001   |
| Ethnicity         | Non-Hispanic                                         | 1            |                         |          |
|                   | Hispanic                                             | 0.95         | 0.91-0.98               | 0.002    |
| Marital Status    | Married                                              | 1            |                         |          |
|                   | Divorced                                             | 1.21         | 1.17-1.25               | <0.001   |
|                   | Separated                                            | 1.11         | 1.03-1.20               | 0.006    |
|                   | Never married                                        | 1.19         | 1.15-1.22               | <0.001   |
|                   | Widowed                                              | 1.14         | 1.11-1.17               | <0.001   |
|                   | Unmarried or domestic partner                        | 0.76         | 0.45-1.29               | 0.31     |
|                   | Unknown                                              | 1.08         | 1.03-1.13               | 0.002    |
| Tumor Location    | Cecum                                                | 1            |                         |          |
|                   | Appendix                                             | 0.71         | 0.68-0.74               | <0.001   |
| Histology         | Non-mucinous                                         | 1            |                         |          |
|                   | Mucinous                                             | 0.94         | 0.92-0.97               | <0.001   |
|                   | Signet-ring cell                                     | 1.30         | 1.23-1.37               | <0.001   |
| Stage             | Local                                                | 1            |                         |          |
|                   | Regional                                             | 1.99         | 1.93-2.06               | <0.001   |
|                   | Distant                                              | 6.64         | 6.42-6.87               | <0.001   |
|                   | Unknown                                              | 2.41         | 2.33-2.50               | <0.001   |
| Grade             | I: Well differentiated                               | 1            |                         |          |
|                   | II: Moderately differentiated                        | 1.22         | 1.18-1.26               | <0.001   |
|                   | III: Poorly differentiated                           | 1.74         | 1.68-1.80               | <0.001   |
|                   | IV: Undifferentiated; anaplastic                     | 1.98         | 1.85-2.11               | <0.001   |
|                   | Unknown                                              | 1.30         | 1.25-1.36               | <0.001   |

|                                     |                              |      |           |                  |
|-------------------------------------|------------------------------|------|-----------|------------------|
| Surgery                             | Surgery                      | 1    |           |                  |
|                                     | No surgery                   | 2.81 | 2.73-2.90 | <b>&lt;0.001</b> |
|                                     | Unknown                      | 2.78 | 2.51-3.09 | <b>&lt;0.001</b> |
| Chemotherapy                        | Chemotherapy                 | 1    |           |                  |
|                                     | No chemotherapy/Unknown      | 1.10 | 1.08-1.12 | <b>&lt;0.001</b> |
| Percent Smokers                     | >50 <sup>th</sup> percentile | 1.01 | 0.98-1.04 | 0.44             |
|                                     | <50 <sup>th</sup> percentile | 1    |           |                  |
| Percent College Education           | >50 <sup>th</sup> percentile | 0.99 | 0.97-1.01 | 0.28             |
|                                     | <50 <sup>th</sup> percentile | 1    |           |                  |
| Percent Minority                    | >50 <sup>th</sup> percentile | 1.01 | 0.98-1.04 | 0.56             |
|                                     | <50 <sup>th</sup> percentile | 1    |           |                  |
| Percent Urban Population            | >50 <sup>th</sup> percentile | 1.00 | 0.97-1.02 | 0.65             |
|                                     | <50 <sup>th</sup> percentile | 1    |           |                  |
| Percent Foreign-born Population     | >50 <sup>th</sup> percentile | 0.97 | 0.94-1.00 | 0.05             |
|                                     | <50 <sup>th</sup> percentile | 1    |           |                  |
| Percent Below Poverty Line          | >50 <sup>th</sup> percentile | 1.05 | 1.03-1.08 | <b>&lt;0.001</b> |
|                                     | <50 <sup>th</sup> percentile | 1    |           |                  |
| Percent Colorectal Cancer Screening | >50 <sup>th</sup> percentile | 0.93 | 0.92-0.95 | <b>&lt;0.001</b> |
|                                     | <50 <sup>th</sup> percentile | 1    |           |                  |

\*The significance level was set at  $p < 0.05$ . Significant p-values are shown in bold.
